# Supplementary material for: Dietary Supplementation of Microbial Dextran and Inulin Exerts Hypocholesterolemic Effects and Modulates Gut Microbiota in BALB/c Mice Models
Source: MDPI journal article supplement (doi:10.3390/ijms24065314), 2023-03-10
Supplement: s1 [file s1]

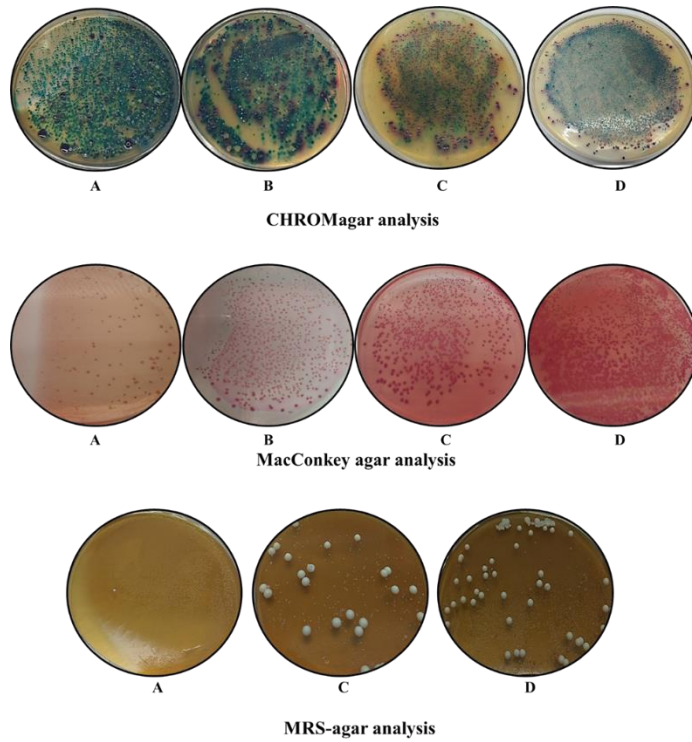

**Figure S1.** Analysis of intestinal microbiota of mice on various selective agar media including CHROMagar, MacConkey agar and MRS agar. The legends are described as: A: control B: scratch control C: Dextran fed mice D: inulin fed mice.

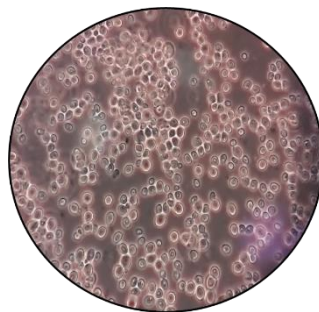

**Figure S2.** Microscopic image of large white colonies of yeast isolated from mice intestinal fluid appeared on MRS-agar plates.
